# Supplementary material
Source: PubMed Central journal article supplement (PMC9169507)

Supplementary Figure 1.

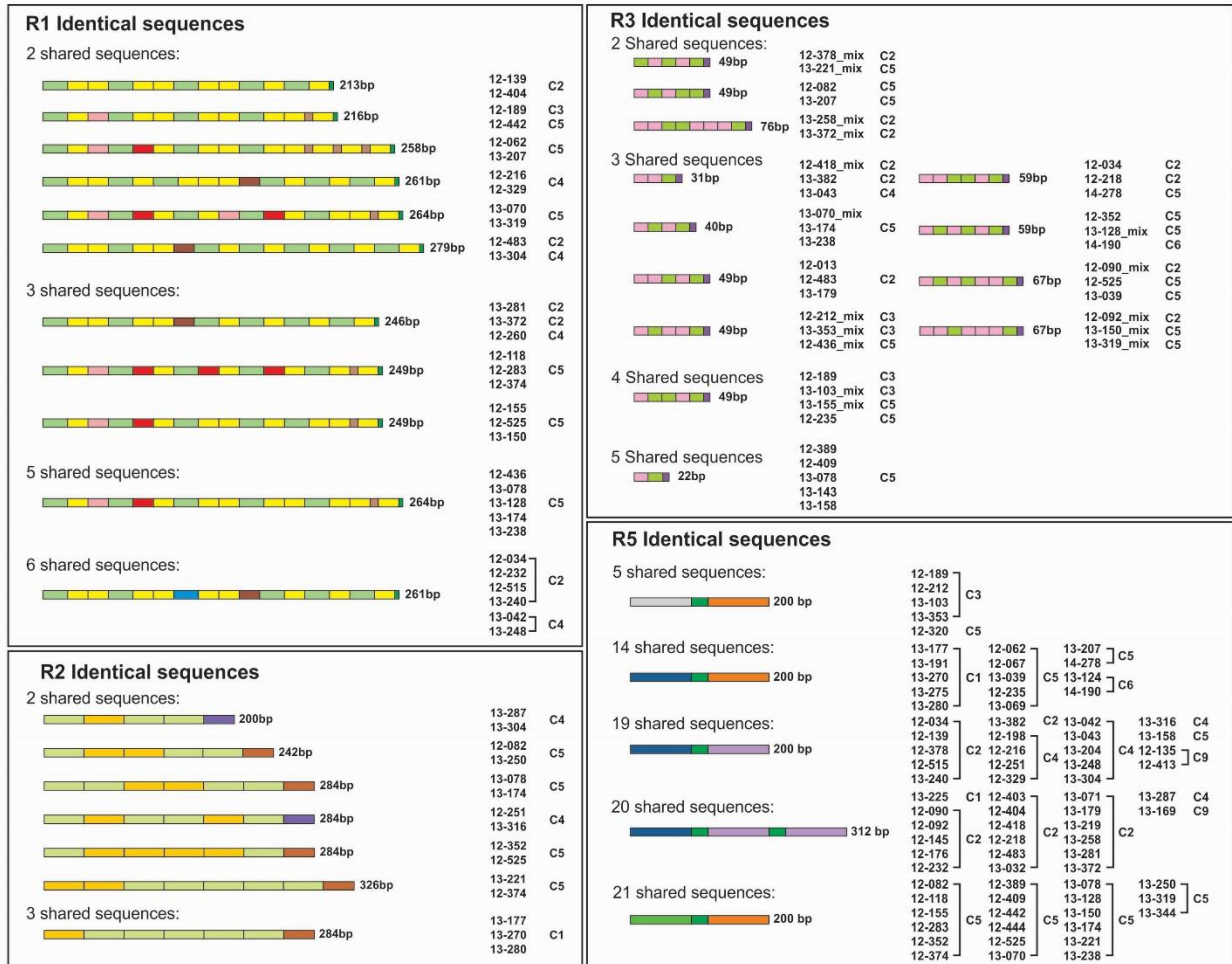

Supplement: NIHMS1807030-supplement-1.pdf [file NIHMS1807030-supplement-1.pdf]
